# Supplementary material for: Poly(2,6-anthraquinonyl disulfide) as a high-capacity and high-power cathode for rechargeable magnesium batteries: extra capacity provided by the disulfide group
Source: Royal Society of Chemistry journal article supplement (doi:10.1039/d3ta01293j), 2023-01-01
Supplement: d3ta01293j1.pdf [file d3ta01293j1.pdf]

## Electronic Supplementary Information

### **Poly(2,6-anthraquinonyl disulfide) as a high-capacity and high-power cathode for rechargeable magnesium batteries: Extra capacity provided by the disulfide group**

Xin Ren<sup>a</sup>, Donggang Tao<sup>a</sup>, Yudi Tang<sup>a</sup>, Yuliang Cao<sup>b</sup>, Fei Xu<sup>\*a</sup>

<sup>a</sup> Key Laboratory of Hydraulic Machinery Transients, Ministry of Education, School of Power and Mechanical Engineering, Wuhan University, Wuhan 430072, China.

<sup>b</sup> Hubei Key Lab of Electrochemical Power Sources, College of Chemistry & Molecular Science, Wuhan University, Wuhan 430072, China.

\* E-mail: Fei Xu (xufei2058@whu.edu.cn)

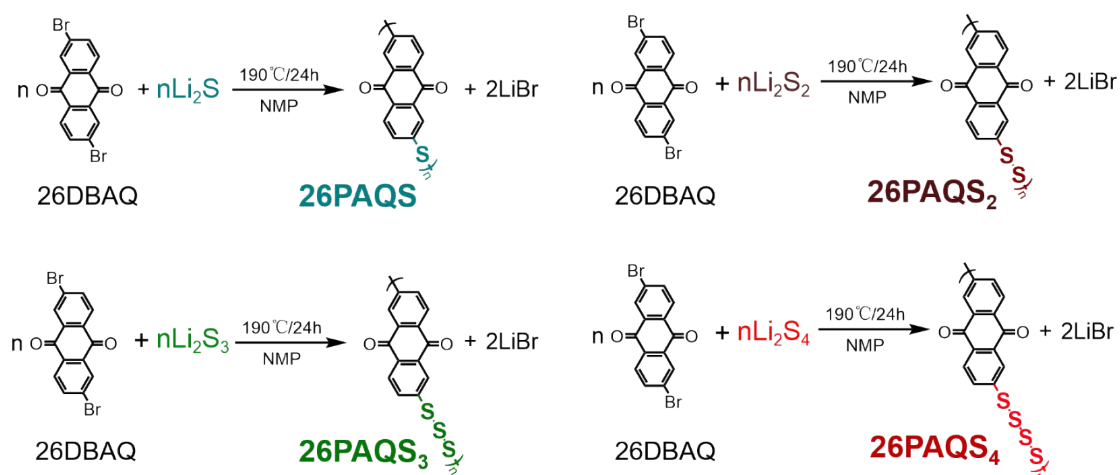

**Fig. S1** Proposed synthesis routines.

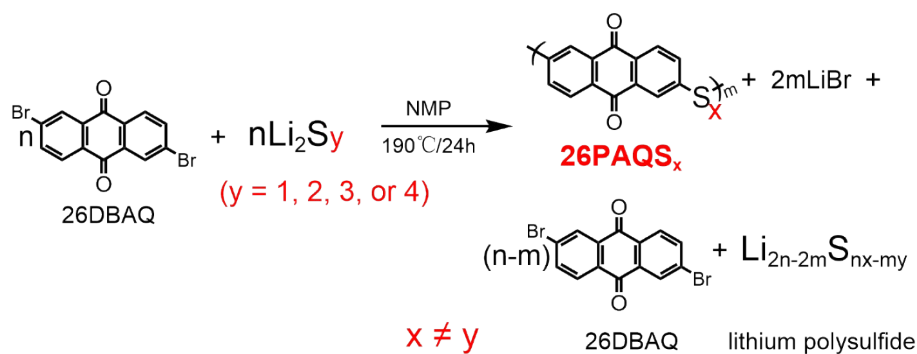

**Fig. S2** Actual synthesis routines.

Fig. S1 describes the proposed synthesis routines. However, the actual reactions are different from Fig. S1, because the nucleophilicity of  $\text{S}_y^{2-}$  decreases with the increasing  $y$  value (Fig. S2). This is reflected in the decreasing yields (Table S1). The unreacted 26DBAQ and remaining lithium polysulfide (Fig. S2) existed in the liquid solution and were separated from the solid products (26PAQS <sub>$x$</sub> ). This would lead to a difference of the sulfur contents between the starting materials ( $y$  of  $\text{Li}_2\text{S}_y$  in Fig. S2) and the products ( $x$  of 26PAQS <sub>$x$</sub>  in Fig. S2). The actual sulfur contents of the products were determined by EDS and ICP and shown in Fig. 1b of the main text.

**Table S1** Yields of 26PAQS, 26PAQS<sub>1,4</sub>, 26PAQS<sub>1,9</sub> and 26PAQS<sub>2,2</sub>.

| Samples               | Yields |
|-----------------------|--------|
| 26PAQS                | 64     |
| 26PAQS <sub>1,4</sub> | 52     |
| 26PAQS <sub>1,9</sub> | 35     |
| 26PAQS <sub>2,2</sub> | 20     |

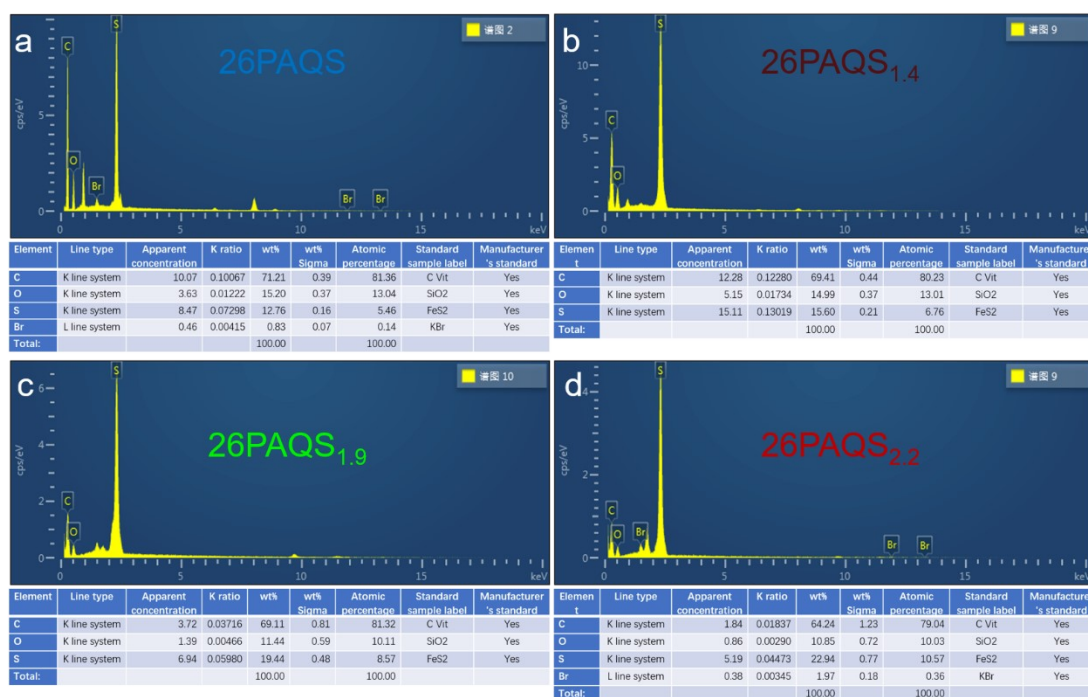

**Fig. S3** EDS of (a) 26PAQS, (b) 26PAQS<sub>1.4</sub>, (c) 26PAQS<sub>1.9</sub> and (d) 26PAQS<sub>2.2</sub>.

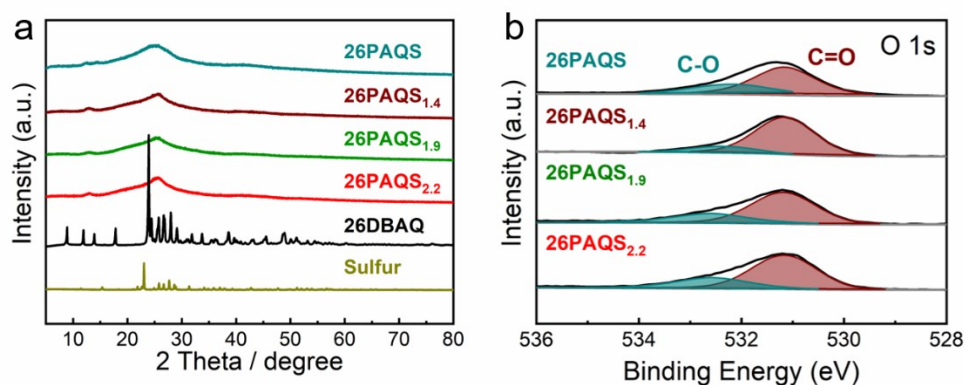

**Fig. S4** (a) XRD patterns and (b) O 1s XPS spectra of 26PAQS, 26PAQS<sub>1.4</sub>, 26PAQS<sub>1.9</sub>, 26PAQS<sub>2.2</sub> and 26DBAQ.

The C=O (287.1 eV)/C–O (285.5 eV)/C–C (284.8 eV) peaks in the C 1s spectra and the C–O (533.1 eV)/C=O (531.1 eV) peaks in the O 1s spectra verify that the conjugated carbonyl group remains stable during the polymerization.

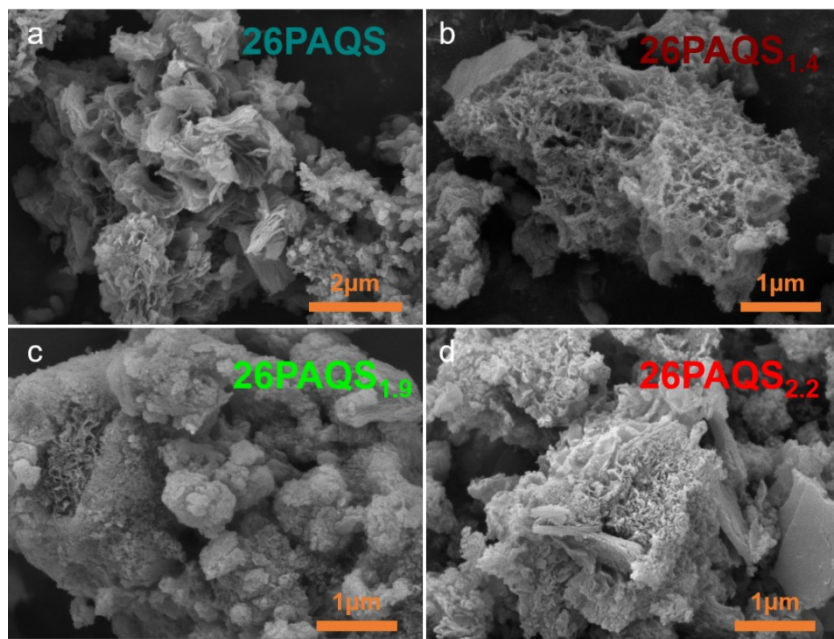

**Fig. S5** SEM images of (a) 26PAQS, (b) 26PAQS<sub>1.4</sub>, (c) 26PAQS<sub>1.9</sub> and (d) 26PAQS<sub>2.2</sub>.

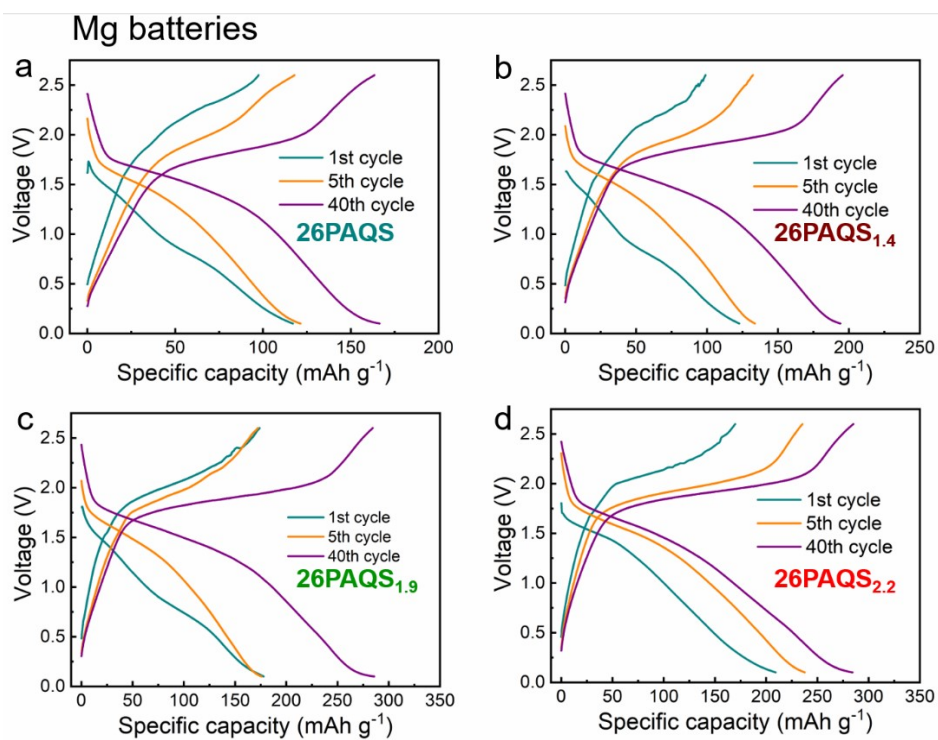

**Fig. S6** Charge/discharge profiles of (a) 26PAQS, (b) 26PAQS<sub>1.4</sub>, (c) 26PAQS<sub>1.9</sub> and (d) 26PAQS<sub>2.2</sub> at 50 mA g<sup>-1</sup>.

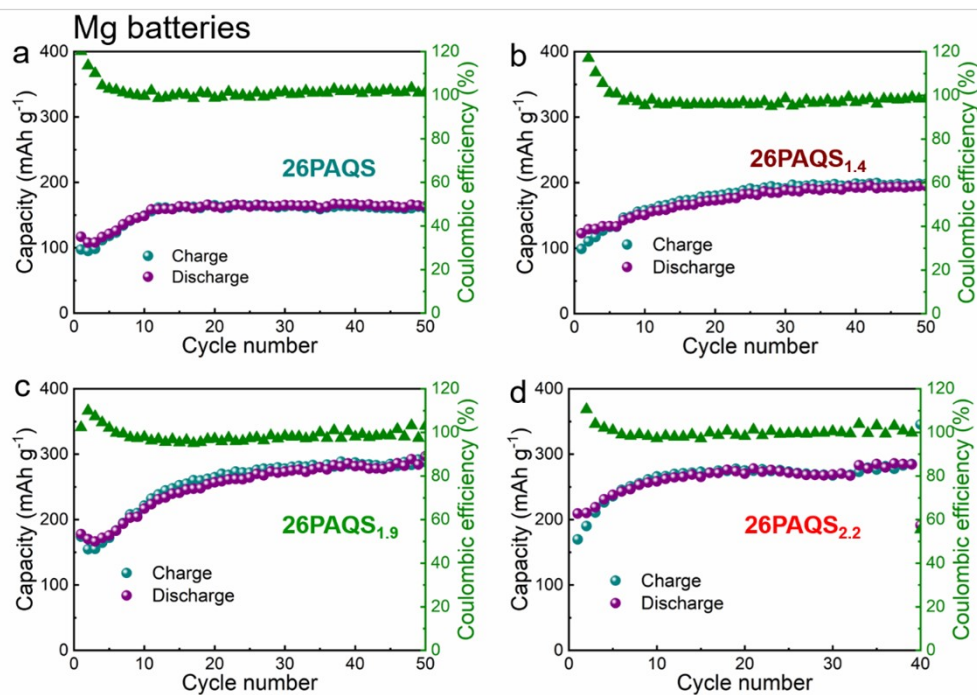

**Fig. S7** Cycling performances of (a) 26PAQS, (b) 26PAQS<sub>1.4</sub>, (c) 26PAQS<sub>1.9</sub> and (d) 26PAQS<sub>2.2</sub> at 50 mA g<sup>-1</sup>.

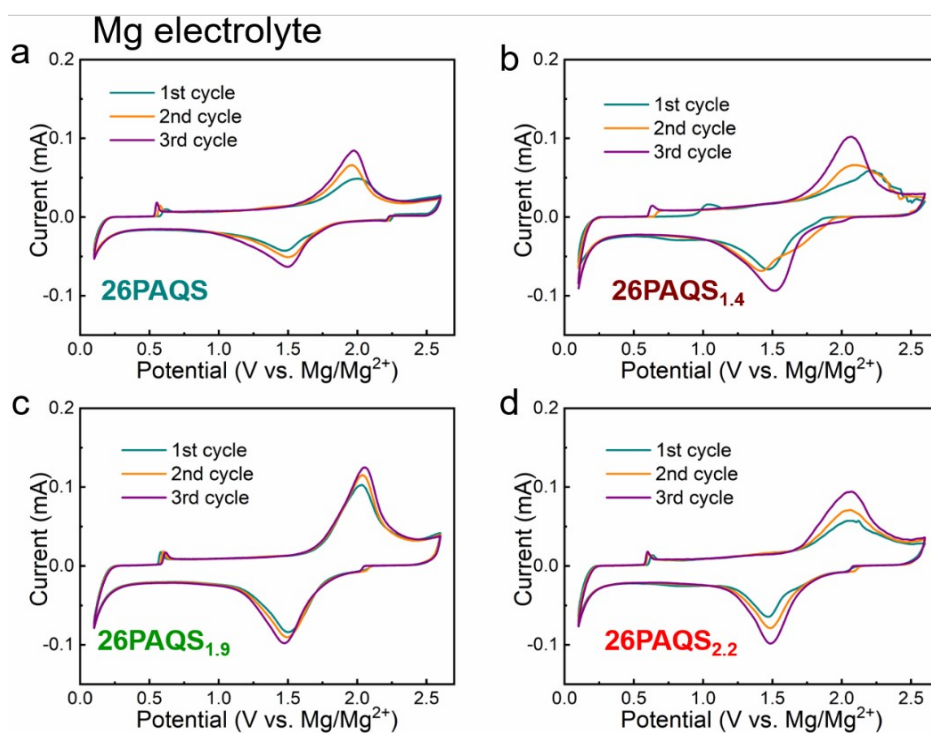

**Fig. S8** CV curves of (a) 26PAQS, (b) 26PAQS<sub>1.4</sub>, (c) 26PAQS<sub>1.9</sub> and (d) 26PAQS<sub>2.2</sub> in Mg electrolytes at first three cycles (0.1 mV s<sup>-1</sup>).

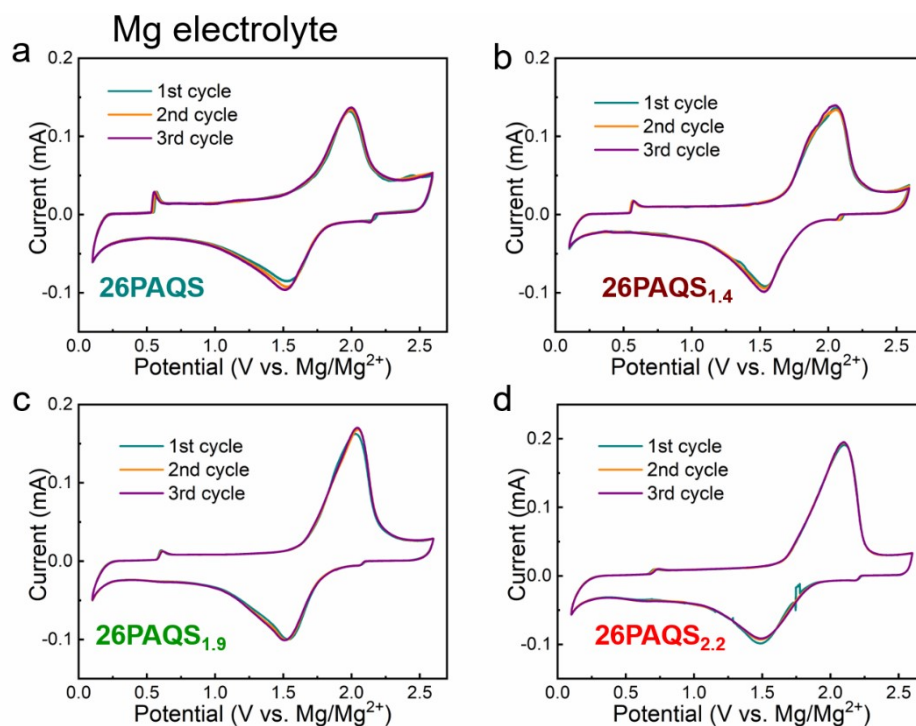

**Fig. S9** CV curves of (a) 26PAQS, (b) 26PAQS<sub>1.4</sub>, (c) 26PAQS<sub>1.9</sub> and (d) 26PAQS<sub>2.2</sub> in Mg electrolytes after activations (0.1 mV s<sup>-1</sup>).

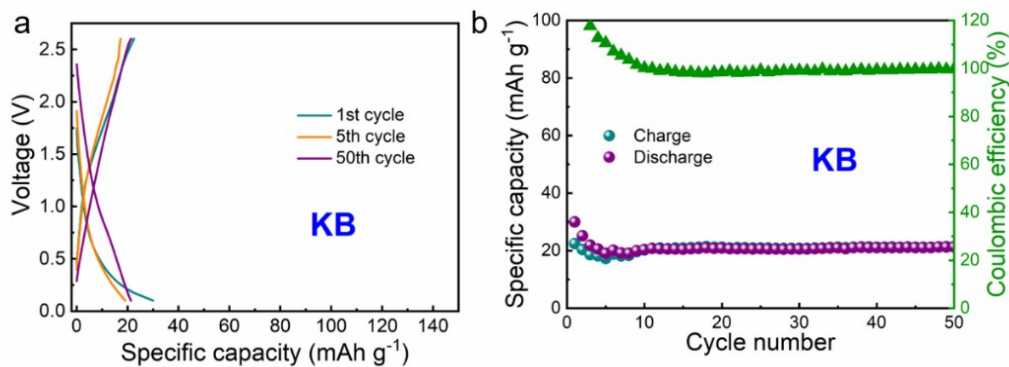

**Fig. S10** (a) Charge/discharge curves and (b) cycling performance of KB. The mass of KB was the same as that contained in the 26PAQS<sub>x</sub> cathodes, and the mass of the active material was set the same as the 26PAQS<sub>x</sub> electrode for a comparison.

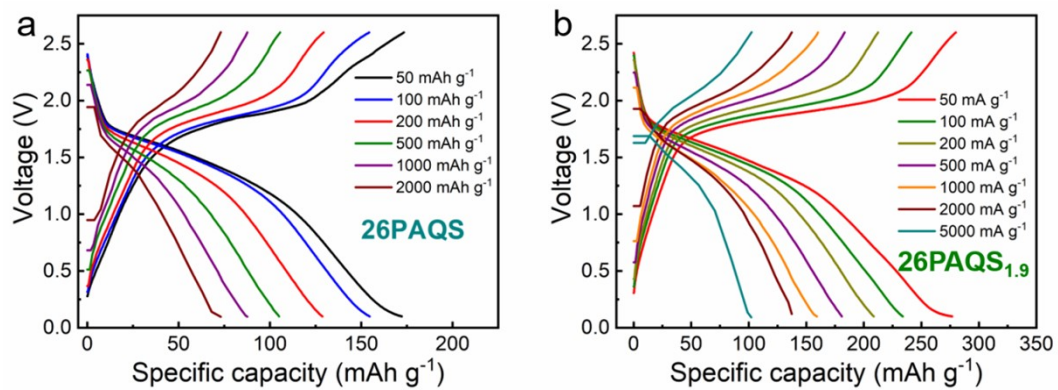

**Fig. S11** Charge/discharge profiles of (a) 26PAQS and (b) 26PAQS<sub>1.9</sub> at different current densities.

**Table S2** Energy density calculation of rechargeable Mg batteries.

| Cathodes                                                                       | Electrolytes                                         | Cc (mAh g <sup>-1</sup> ) | Ca (mAh g <sup>-1</sup> ) | C (wt%) | Ce (mAh g <sup>-1</sup> ) | E (V) | Specific Energy (Wh kg <sup>-1</sup> ) |
|--------------------------------------------------------------------------------|------------------------------------------------------|---------------------------|---------------------------|---------|---------------------------|-------|----------------------------------------|
| Mo <sub>6</sub> S <sub>8</sub> <sup>1</sup>                                    | (PhMgCl) <sub>2</sub> -AlCl <sub>3</sub> /THF        | 76                        | 2205                      | 0.1041  | 40.88                     | 1.10  | 28.9                                   |
| Mo <sub>6</sub> Se <sub>6</sub> <sup>2</sup>                                   | (PhMgCl) <sub>2</sub> -AlCl <sub>3</sub> /THF        | 80                        | 2205                      |         |                           | 1.05  | 28.1                                   |
| DMBQ <sup>3</sup>                                                              | Mg(TFSI) <sub>2</sub> -2MgCl <sub>2</sub> /DME       | 225                       | 2205                      | 0.07767 | 43.82                     | 2.00  | 72.2                                   |
| PHV-Cl <sup>4</sup>                                                            | (PhMgCl) <sub>2</sub> -AlCl <sub>3</sub> /THF        | 171                       | 2205                      | 0.1041  | 40.88                     | 1.30  | 42.3                                   |
| NP <sup>5</sup>                                                                | Mg(TFSI) <sub>2</sub> -MgCl <sub>2</sub> /TEGDME-DOL | 70                        | 2205                      | 0.0291  | 16.42                     | 1.60  | 21.2                                   |
| Mg-14PAQ <sup>6</sup>                                                          | Mg(HMDS) <sub>2</sub> -4MgCl <sub>2</sub> /THF       | 133                       | 2205                      | 0.1032  | 58.23                     | 1.38  | 54.6                                   |
| P(NDI2OD-T2) <sup>7</sup>                                                      | Mg(TFSI) <sub>2</sub> /diglyme                       | 54                        | 2205                      | /       | /                         | 1.42  | 74.8                                   |
| Mg-P14AQ <sup>7</sup>                                                          | Mg(TFSI) <sub>2</sub> /diglyme                       | 193                       | 2205                      | /       | /                         | 1.37  | 243.1                                  |
| COF <sup>8</sup>                                                               | Mg(TFSI) <sub>2</sub> /DME                           | 114                       | 2205                      | /       | /                         | 1.35  | 146.4                                  |
| Cu <sub>2-x</sub> Se <sup>9</sup>                                              | Mg(HMDS) <sub>2</sub> -2AlCl <sub>3</sub> /diglyme   | 214                       | 2205                      | /       | /                         | 1.00  | 195.1                                  |
| E-VS <sub>2</sub> <sup>10</sup>                                                | (PhMgCl) <sub>2</sub> -AlCl <sub>3</sub> /THF        | 237                       | 2205                      | 0.1041  | 40.88                     | 1.03  | 34.3                                   |
| GO-V <sub>2</sub> O <sub>5</sub> <sup>11</sup>                                 | Mg(AlCl <sub>2</sub> BuEt) <sub>2</sub> -THF         | 180                       | 2205                      | 0.0992  | 13.56                     | 1.50  | 18.8                                   |
| Mg <sub>0.21</sub> Ti <sub>3</sub> C <sub>2</sub> T <sub>x</sub> <sup>12</sup> | (PhMgCl) <sub>2</sub> -AlCl <sub>3</sub> /THF        | 210                       | 2205                      | 0.0562  | 22.08                     | 1.50  | 29.7                                   |
| PA-VOPO <sub>4</sub> <sup>13</sup>                                             | (PhMgCl) <sub>2</sub> -AlCl <sub>3</sub> /THF        | 275                       | 2205                      | 0.0690  | 27.08                     | 1.00  | 24.4                                   |
| PEO-MoS <sub>2</sub> <sup>14</sup>                                             | (PhMgCl) <sub>2</sub> -AlCl <sub>3</sub> /THF        | 70                        | 2205                      | 0.1037  | 40.74                     | 0.70  | 17.8                                   |
| TiS <sub>2</sub> <sup>15</sup>                                                 | (PhMgCl) <sub>2</sub> -AlCl <sub>3</sub> /THF        | 160                       | 2205                      | 0.1041  | 40.88                     | 0.90  | 28.9                                   |
| VS <sub>4</sub> @Ti <sub>3</sub> C <sub>2</sub> /C <sup>16</sup>               | (PhMgCl) <sub>2</sub> -AlCl <sub>3</sub> /THF        | 490                       | 2205                      | 0.0690  | 27.08                     | 1.00  | 25.4                                   |
| 26PAQS <sub>1.9</sub>                                                          | Mg(TFSI) <sub>2</sub> -2MgCl <sub>2</sub> /DME       | 276                       | 2205                      | /       | /                         | 1.51  | 367.9                                  |



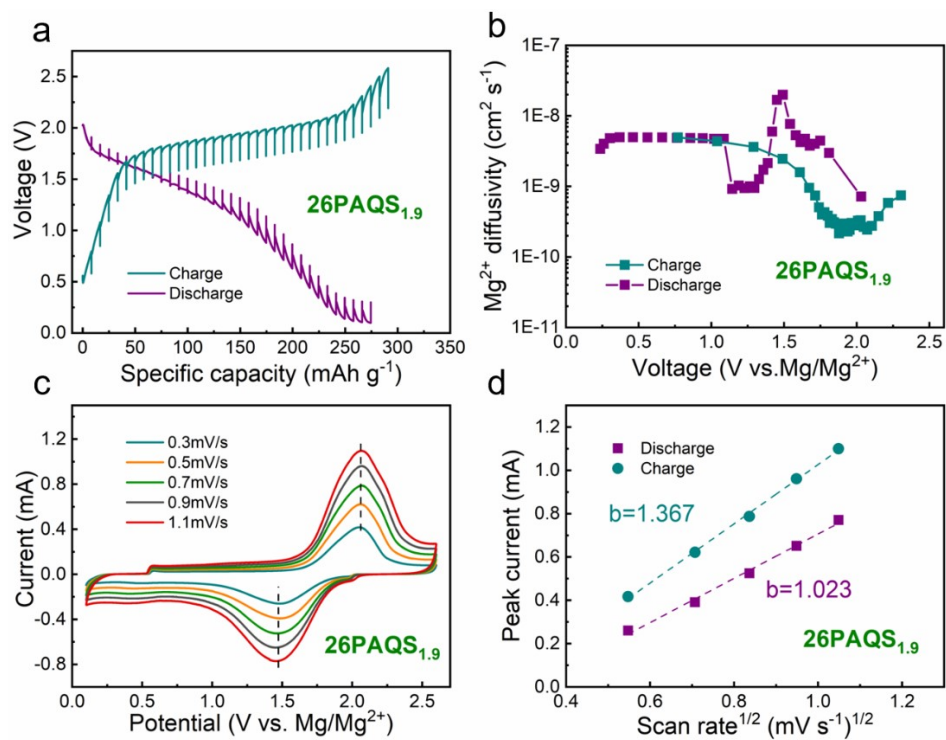

**Fig. S12** (a) GITT profiles and (b)  $\text{Mg}^{2+}$  diffusion coefficients of 26PAQS<sub>1.9</sub>. (c) CV curves of PAQS<sub>1.9</sub> at different scan rates. (d)  $i_p$  vs.  $-\nu^{1/2}$  plots for the redox peaks of PAQS<sub>1.9</sub>.

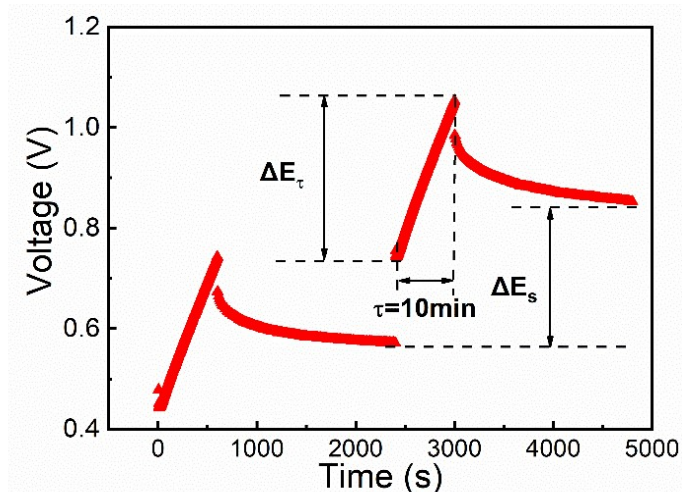

**Fig. S13** Calculation details of GITT.

The  $\text{Mg}^{2+}$  diffusivity can be calculated via the following formula:

$$D^{GITT} = \frac{4}{\pi\tau} \left( \frac{m_B V_M}{M_B S} \right)^2 \left( \frac{\Delta E_s}{\Delta E_\tau} \right)^2$$

Where  $\tau$  refers to constant current pulse time,  $m_B$  and  $M_B$  are the mass, molar mass of the cathode material, respectively.  $V_m$  is the molar volume of the compound and  $S$  is the area of electrode-electrolyte interface.  $\Delta E_s$  is voltage difference during a single-step experiment, and  $\Delta E_\tau$  is the total change of cell voltage during a constant current pulse.

**Table S3** Calculation of  $\text{Mg}^{2+}$  diffusion coefficients at  $1.1 \text{ mV s}^{-1}$ .

|           | 26PAQS <sub>1.9</sub> |                                          |
|-----------|-----------------------|------------------------------------------|
|           | $i_p/v^{1/2}$         | $D \text{ (cm}^2 \text{ s}^{-1}\text{)}$ |
| Discharge | 1.023                 | $6.80 \times 10^{-9}$                    |
| charge    | 1.367                 | $1.21 \times 10^{-8}$                    |

The diffusion coefficient of  $\text{Mg}^{2+}$  is calculated by the following Randles-Sevcik Equation:

$$i_p = 2.69 \times 10^5 n^{3/2} A D^{1/2} v^{1/2} C_0$$

where  $i_p$  is the peak current (A),  $n$  is the number of electrons per molecule during the reaction,  $A$  is the contact area between the electrode and electrolyte,  $D$  is the diffusion coefficient of  $\text{Mg}^{2+}$  ( $\text{cm}^2 \text{ s}^{-1}$ ),  $C_0$  is the concentration of  $\text{Mg}^{2+}$  ion in the electrode material, and  $v$  is the scan rate ( $\text{V s}^{-1}$ ).

### Calculation of specific energy for rechargeable Mg batteries: <sup>8</sup>

For energy density calculation of Mg batteries without considering electrolyte mass, the calculation is based on the following equations:

$$E_s = E / (C_c^{-1} + C_a^{-1})$$

where  $E$  is the average discharge voltage,  $C_c$  is specific capacity of cathode,  $C_a$  is specific capacity of anode.

## Reference

- [1] P. Saha, P. H. Jampani, M. K. Datta, C. U. Okoli, A. Manivannan, P. N. Kumta, *J. Electrochem. Soc.* 2014, *161*, A593–A598.
- [2] P. Saha, P. H. Jampani, M. K. Datta, D. Hong, B. Gattu, P. Patel, K. S. Kadakia, A. Manivannan, P. N. Kumta, *Nano Res.* 2017, *10* (12), 4415–4435.
- [3] B. Pan, D. Zhou, J. Huang, L. Zhang, A. K. Burrell, J. T. Vaughey, Z. Zhang, C. Liao, *J. Electrochem. Soc.* 2016, *163*, A580–A583.
- [4] A. B. Ikhe, N. Naveen, K. Sohn, M. Pyo, *Electrochim. Acta* 2018, *283*, 393–400.
- [5] T. Bančič, J. Bitenc, K. Pirnat, A. K. Lautar, J. Grdadolnik, A. R. Vitanova, R. Dominko, *J. Power Sources* 2018, *395*, 25–30.
- [6] B. Pan, J. Huang, Z. Feng,; L. Zeng, M. He, L. Zhang, J. T. Vaughey, M. J. Bedzyk, P. Fenter, Z. Zhang, A. K. Burrell, C. Liao, *Adv. Energy Mater.* 2016, *6*, 1600140.
- [7] H. Dong, Y. Liang, O. Tutusaus, R. Mohtadi, Y. Zhang, F. Hao, Y. Yao, *Joule* 2019, *3*, 782–793.
- [8] R. Sun, S. Hou, C. Luo, X. Ji, L. Wang, L. Mai, C. Wang, *Nano Lett.* 2020, *20*, 3880–3888.
- [9] X. Xue, R. Chen, X. Song, A. Tao, W. Yan, W. Kong, Z. Jin, *Adv. Funct. Mater.* 2021, *31*, 2009394.
- [10] P. Jing, H. Lu, W. Yang, Y. Cao, *Electrochimica Acta* 2020, *330*, 135263.
- [11] X. Du, G. Huang, Y. Qin, L. Wang, *RSC Adv.* 2015, *5*, 76352–76355.
- [12] M. Q. Zhao, C. E. Ren, M. Alhabeab, B. Anasori, M. W. Barsoum, Y. Gogotsi, *ACS Appl. Energy Mater.* 2019, *2*, 1572–1578.
- [13] L. Zhou, Q. Liu, Z. Zhang, K. Zhang, F. Xiong, S. Tan, Q. An, Y. M. Kang, Z. Zhou, L. Mai, *Adv. Mater.* 2018, *30*, 1801984.
- [14] H. J. Lee, J. Shin, J. W. Choi, *Adv. Mater.* 2018, *30*, 1705851.
- [15] X. Sun, P. Bonnick, L. F. Nazar, *ACS Energy Lett.* 2016, *1*, 297–301.
- [16] J. Zhu, X. Zhang, H. Gao, Y. Shao, Y. Liu, Y. Zhu, J. Zhang, L. Li, *Journal of Power Sources* 2022, *518*, 230731.
